# Supplementary material for: One-pot strategy for synthesis of open-cage silsesquioxane monomers
Source: Royal Society of Chemistry journal article supplement (doi:10.1039/c9py00036d), 2019-01-01
Supplement: c9py00036d1.pdf [file c9py00036d1.pdf]

## Supporting Information

# One-pot strategy for synthesis of open-cage silsesquioxane monomers

Ryoichi Katoh, Hiroaki Imoto, and Kensuke Naka\*

Faculty of Molecular Chemistry and Engineering, Graduate School of Science and Technology, Kyoto Institute of Technology, Goshokaido-cho, Matsugasaki, Sakyo-ku, Kyoto 606-8585, Japan.

### Contents:

1. NMR spectra
2. SEC analysis
3. MALDI-TOFMS spectra
4. X-ray diffraction patterns
5. Chemical structure of IC-POSS polymer with CC-POSS pendants
6. References

## 1. NMR spectra

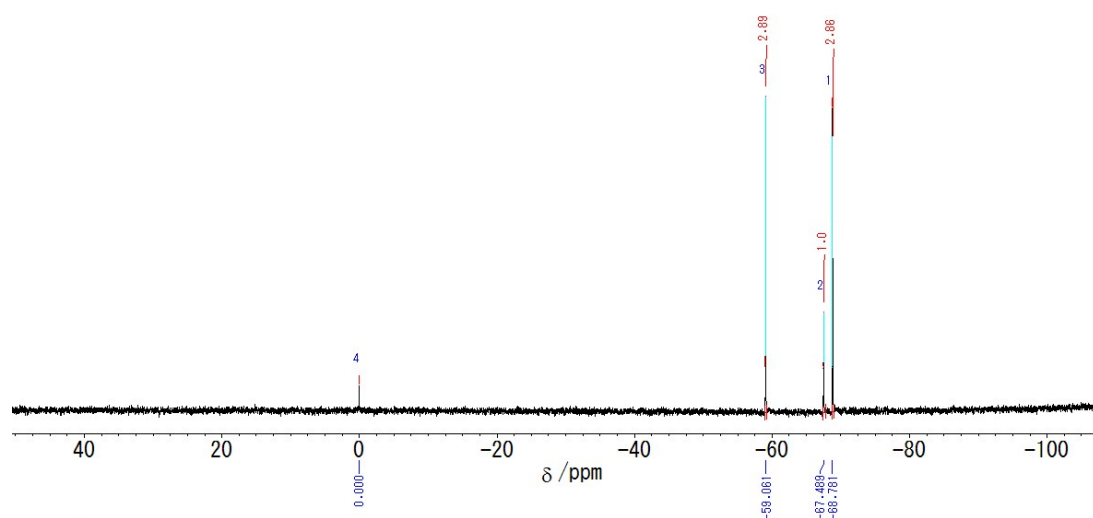

**Figure S1.**  $^{29}\text{Si}$  NMR spectrum (80 MHz) of  $\mathbf{1}_{i\text{Bu}}$  in  $\text{CDCl}_3$ .

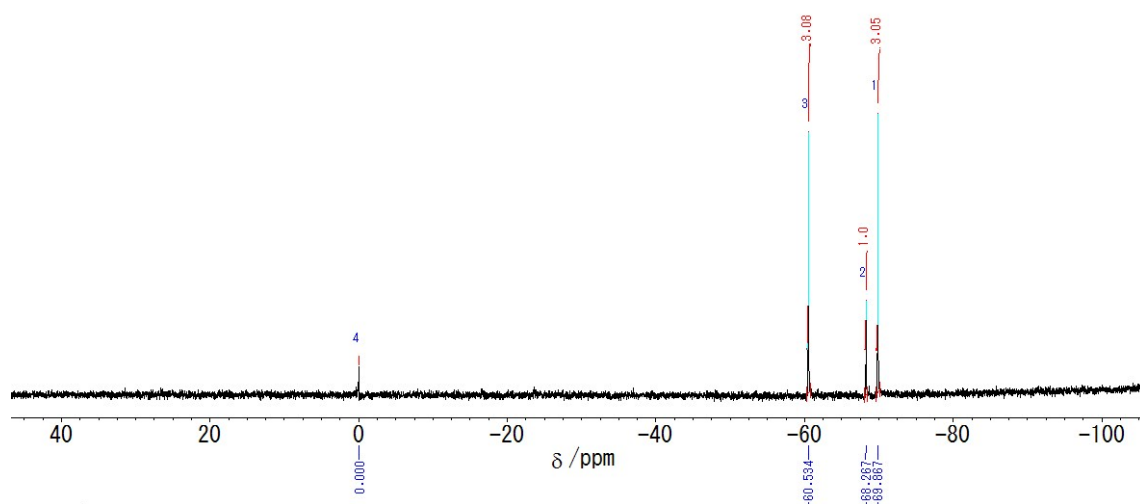

**Figure S2.**  $^{29}\text{Si}$  NMR spectrum (80 MHz) of  $\mathbf{1}_{\text{Cyh}}$  in  $\text{CDCl}_3$ .

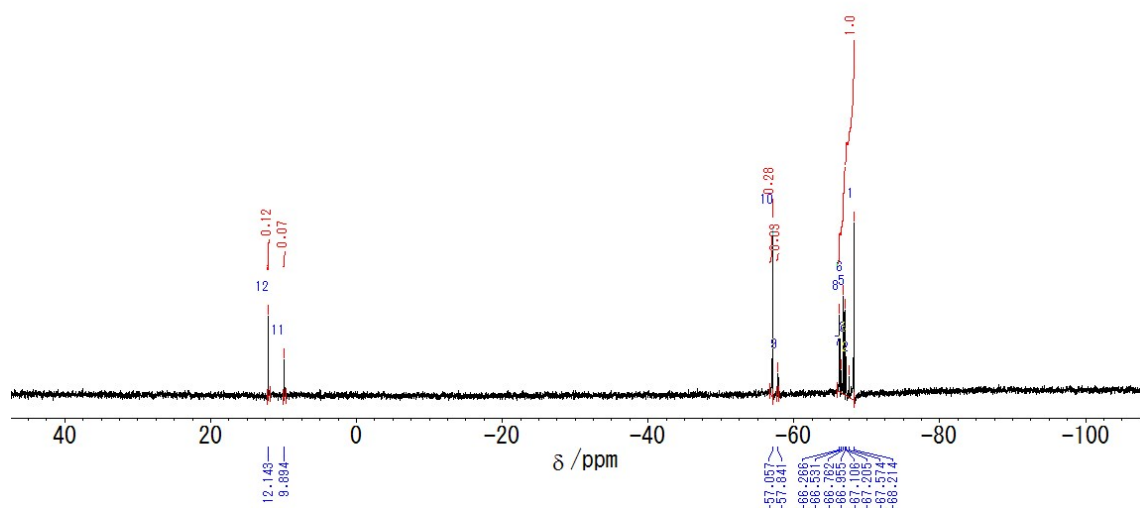

**Figure S3.**  $^{29}\text{Si}$  NMR spectrum (80 MHz) of run 1 of Table 1 in  $\text{CDCl}_3$ .

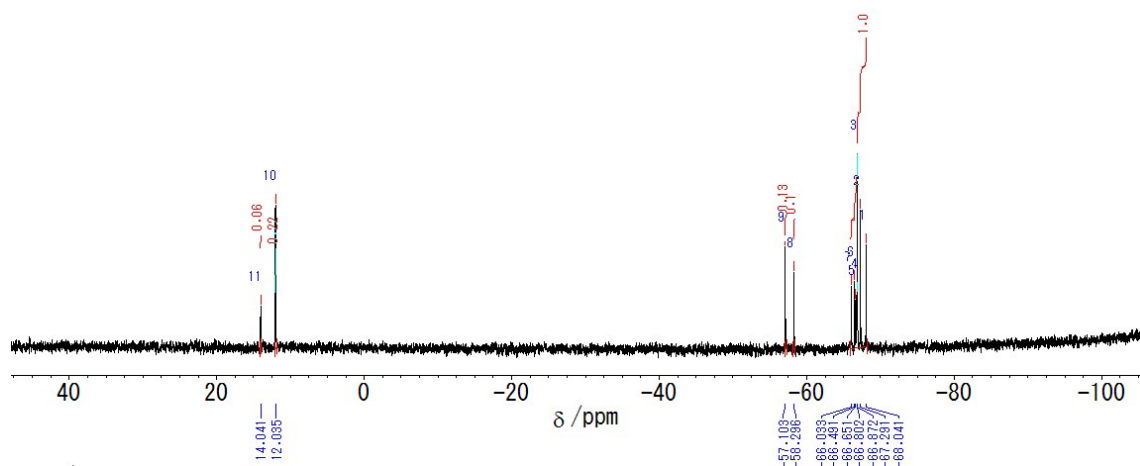

**Figure S4.**  $^{29}\text{Si}$  NMR spectrum (80 MHz) of run 2 of Table 1 in  $\text{CDCl}_3$ .

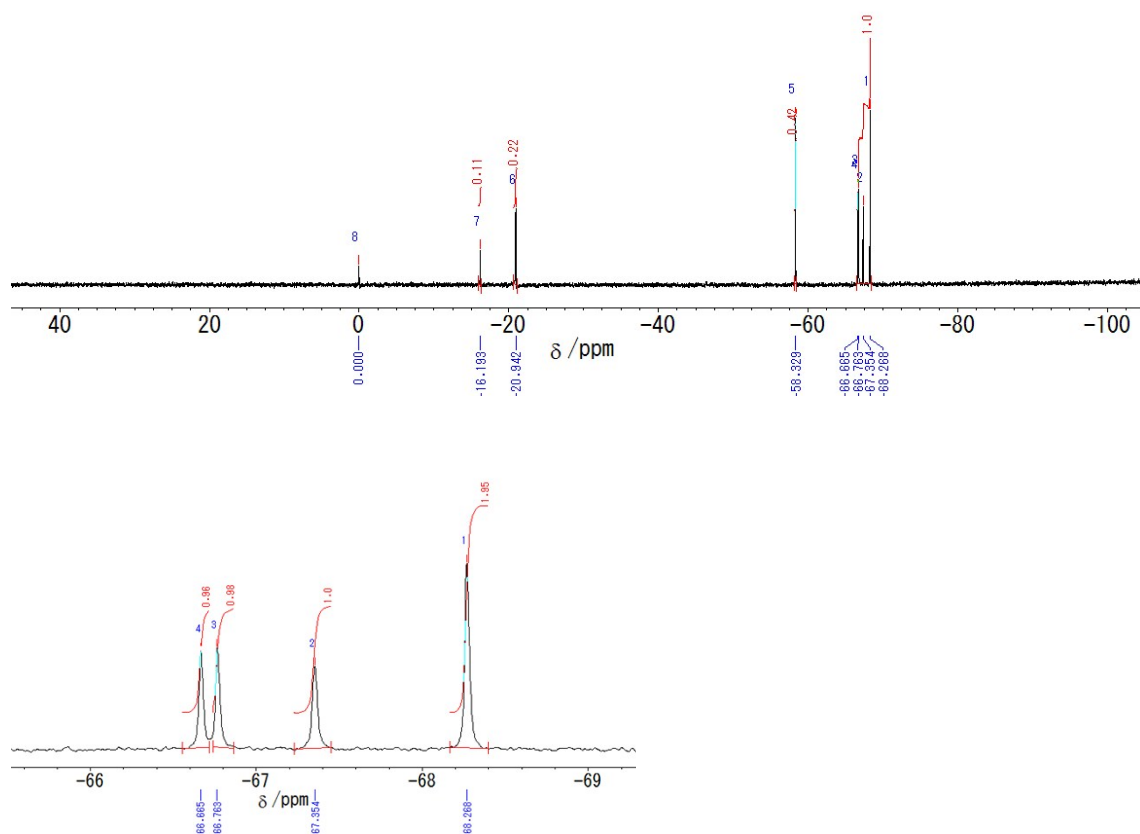

**Figure S5.** (Top)  $^{29}\text{Si}$  NMR spectrum (80 MHz) of run 3 of Table 1 in  $\text{CDCl}_3$ . (Bottom) expanded view of  $^{29}\text{Si}$  NMR spectrum (80 MHz) of run 3 of Table 1 in  $\text{CDCl}_3$ .

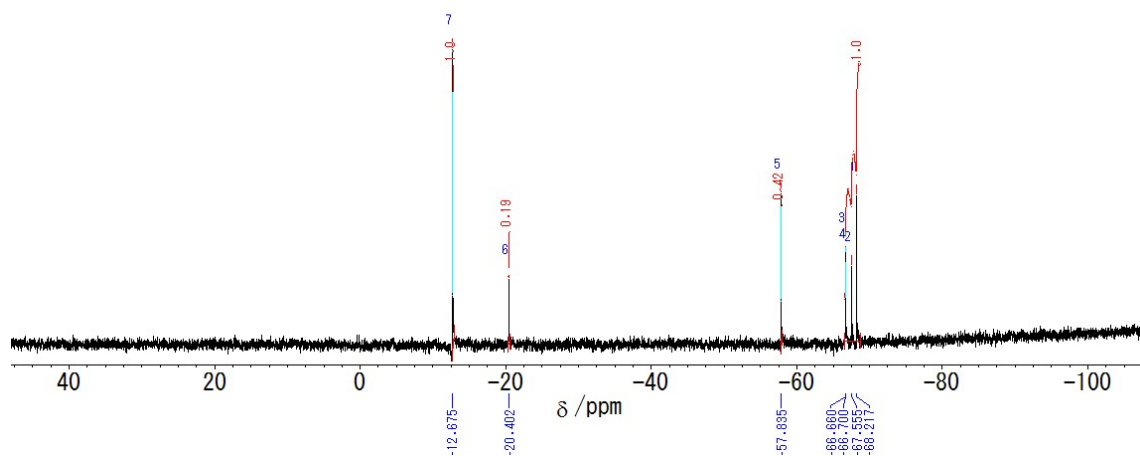

**Figure S6.**  $^{29}\text{Si}$  NMR spectrum (80 MHz) of run 4 of Table 1 in  $\text{CDCl}_3$ .

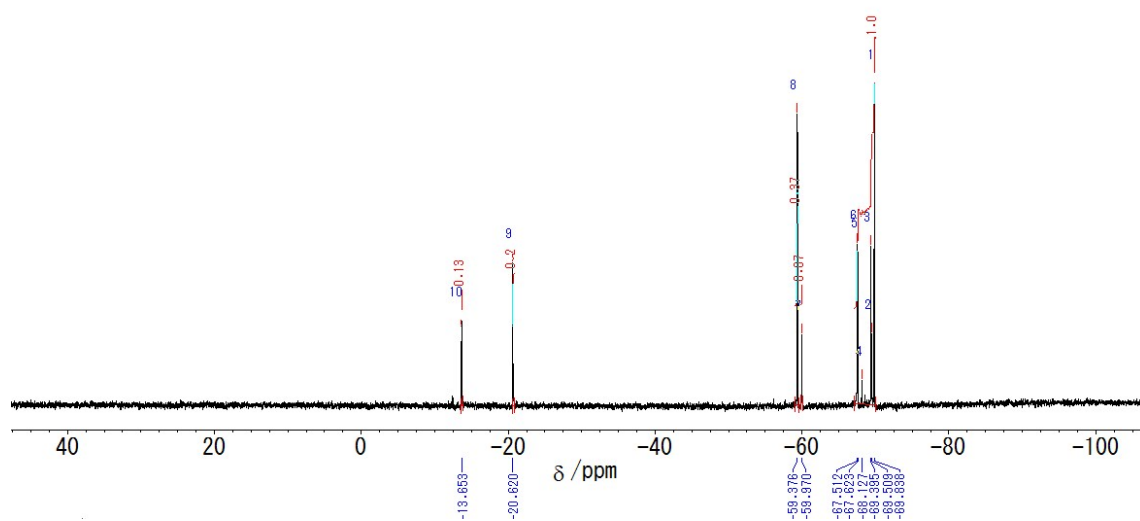

**Figure S7.**  $^{29}\text{Si}$  NMR spectrum (80 MHz) of run 5 of Table 1 in  $\text{CDCl}_3$ .

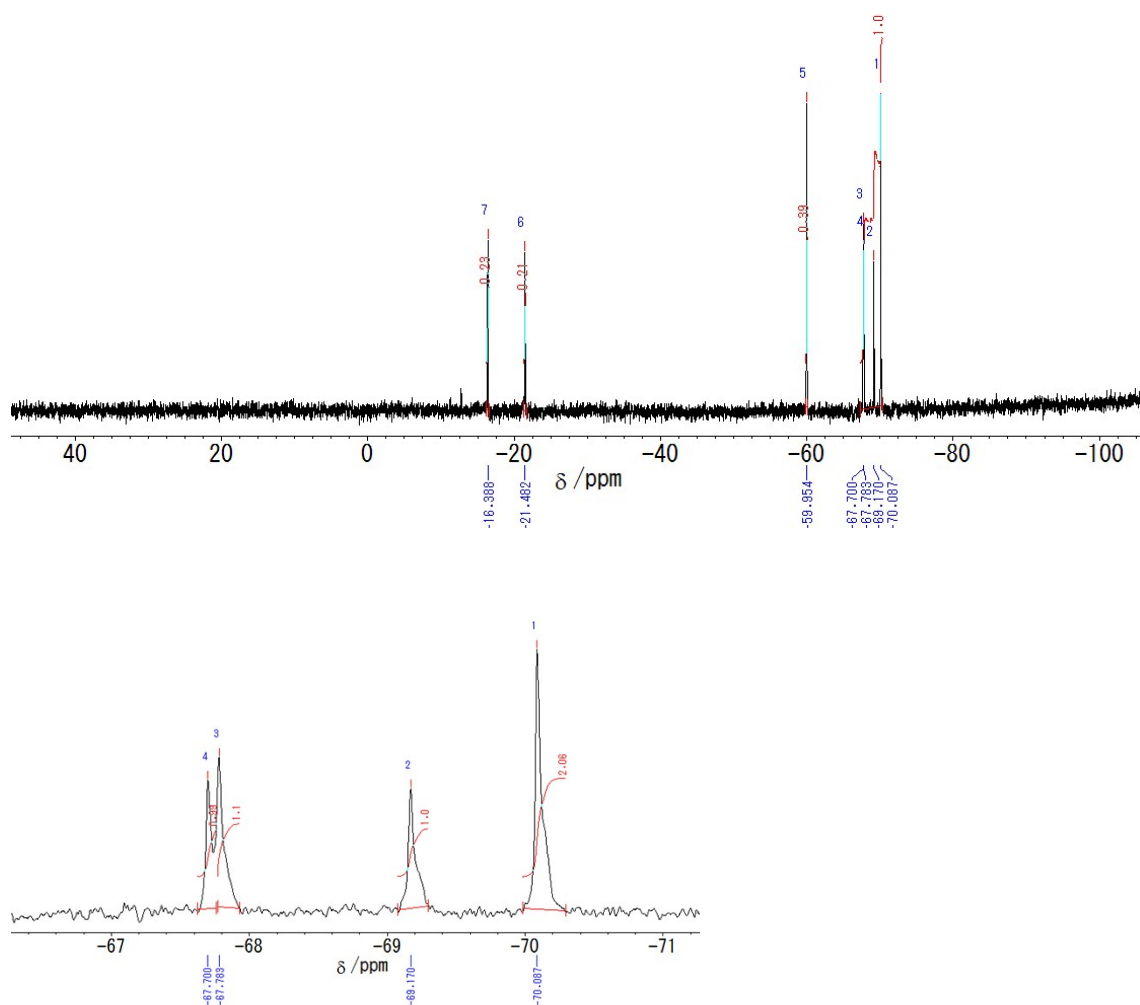

**Figure S8.** (Top)  $^{29}\text{Si}$  NMR spectrum (80 MHz) of run 6 of Table 1 in  $\text{CDCl}_3$ . (Bottom) expanded view of  $^{29}\text{Si}$  NMR spectrum (80 MHz) of run 6 of Table 1 in  $\text{CDCl}_3$ .

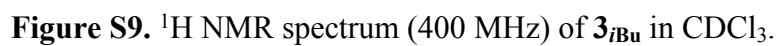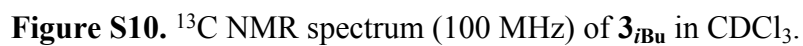

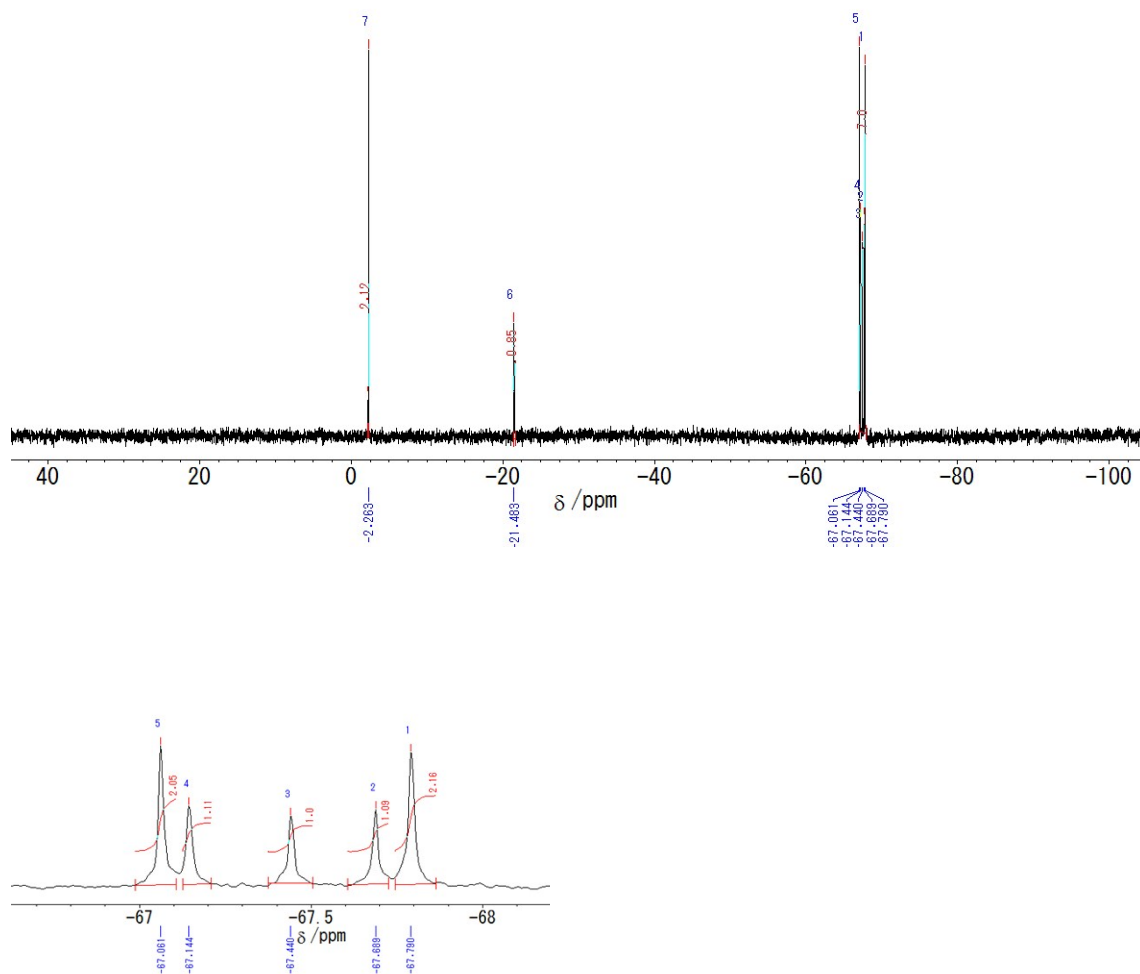

**Figure S11.** (Top)  $^{29}\text{Si}$  NMR spectrum (80 MHz) of  $3_{i\text{Bu}}$  in  $\text{CDCl}_3$ . (Bottom) expanded view of  $^{29}\text{Si}$  NMR spectrum (80 MHz) of  $3_{i\text{Bu}}$  in  $\text{CDCl}_3$ .



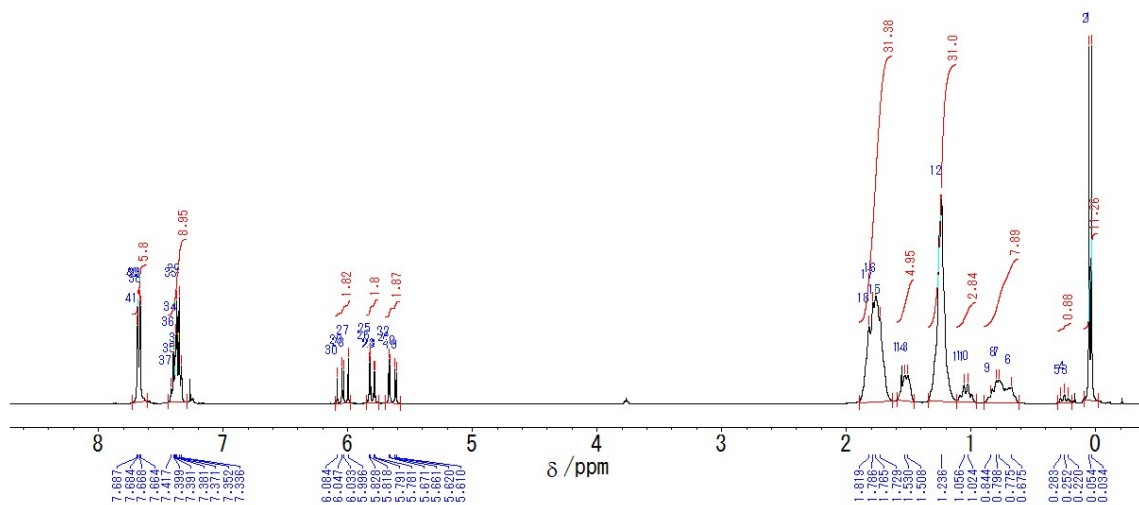

**Figure S12.** <sup>1</sup>H NMR spectrum (400 MHz) of **3<sub>Cyh</sub>** in CDCl<sub>3</sub>.

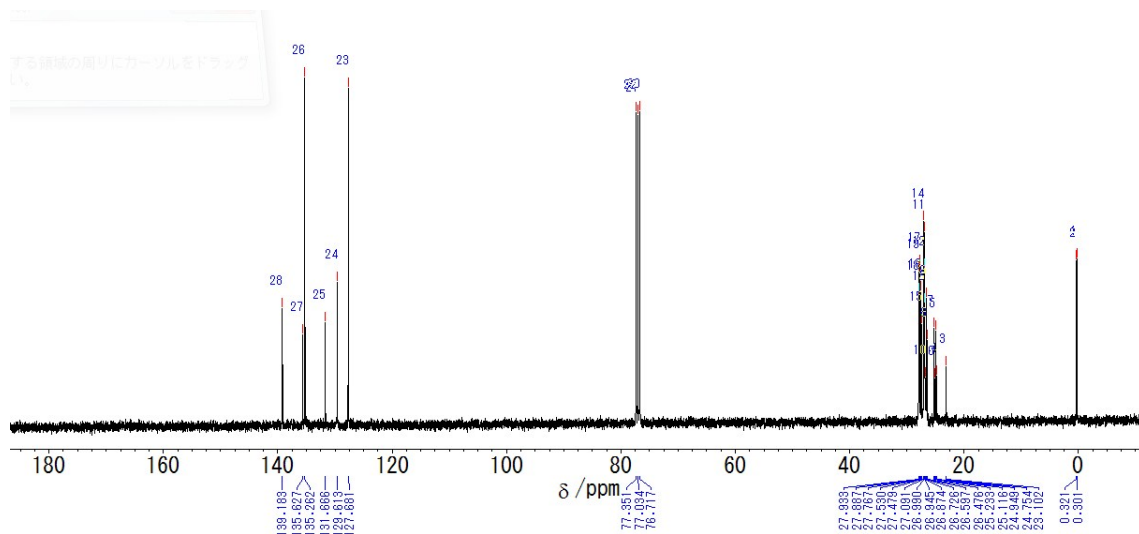

**Figure S13.** <sup>13</sup>C NMR spectrum (100 MHz) of **3<sub>Cyh</sub>** in CDCl<sub>3</sub>.

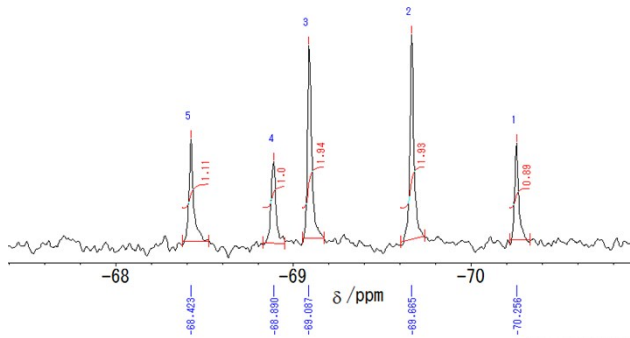

**Figure S14.** (Top)  $^{29}\text{Si}$  NMR spectrum (80 MHz) of **3**<sub>C<sub>yh</sub></sub> in  $\text{CDCl}_3$ . (Bottom) expanded view of  $^{29}\text{Si}$  NMR spectrum (80 MHz) of **3**<sub>C<sub>yh</sub></sub> in  $\text{CDCl}_3$ .

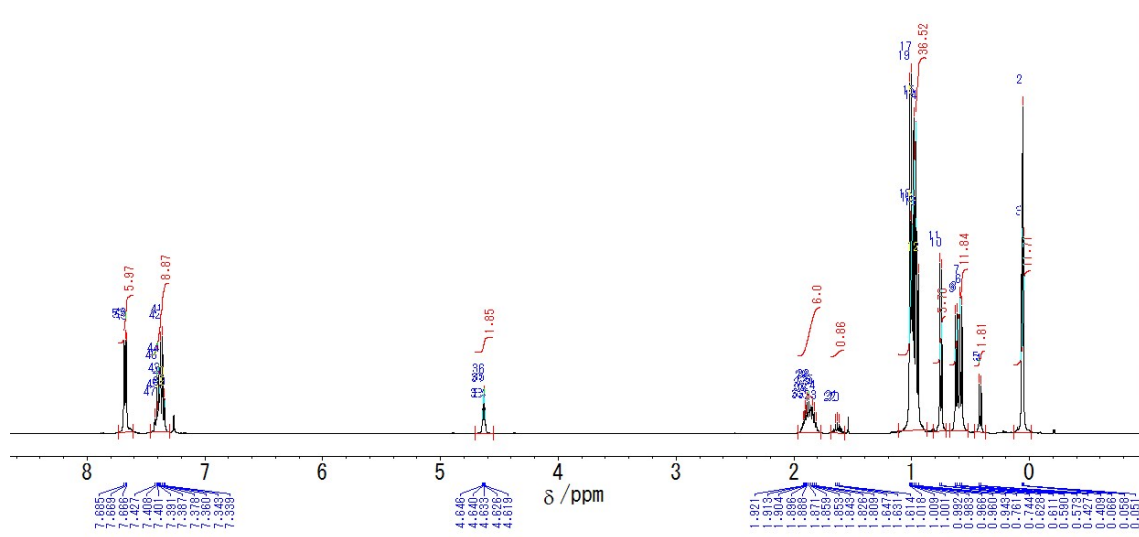

**Figure S15.** <sup>1</sup>H NMR spectrum (400 MHz) of **4<sub>i</sub>Bu** in CDCl<sub>3</sub>.

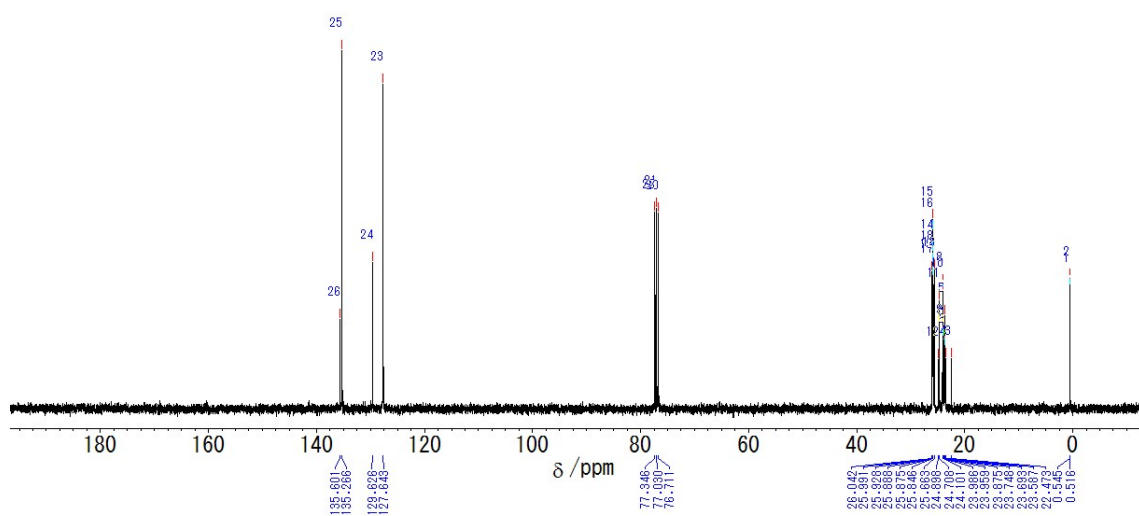

**Figure S16.** <sup>13</sup>C NMR spectrum (100 MHz) of **4<sub>i</sub>Bu** in CDCl<sub>3</sub>.

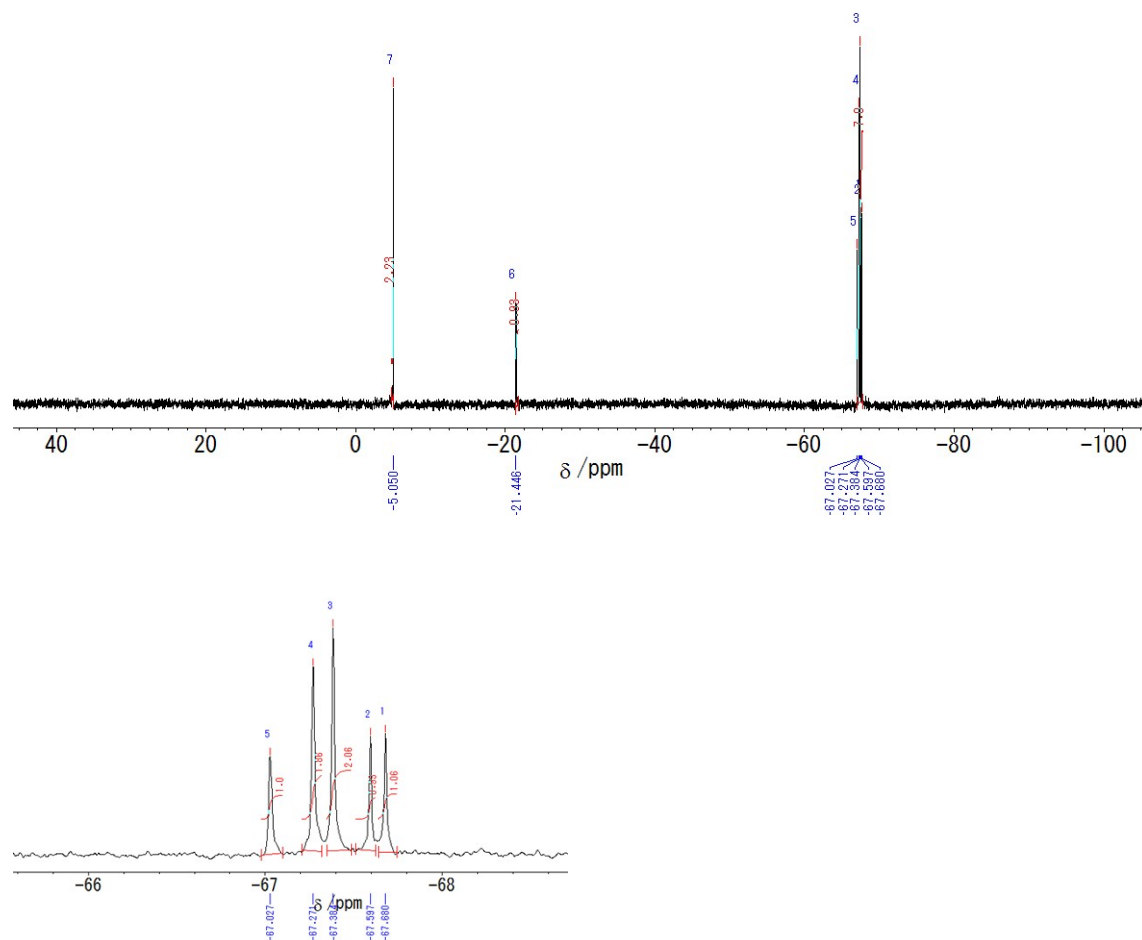

**Figure S17.** (Top)  $^{29}\text{Si}$  NMR spectrum (80 MHz) of  $4_{t\text{Bu}}$  in  $\text{CDCl}_3$ . (Bottom) expanded view of  $^{29}\text{Si}$  NMR spectrum (80 MHz) of  $4_{t\text{Bu}}$  in  $\text{CDCl}_3$ .

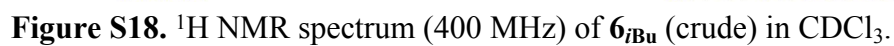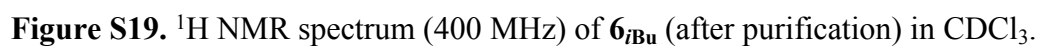

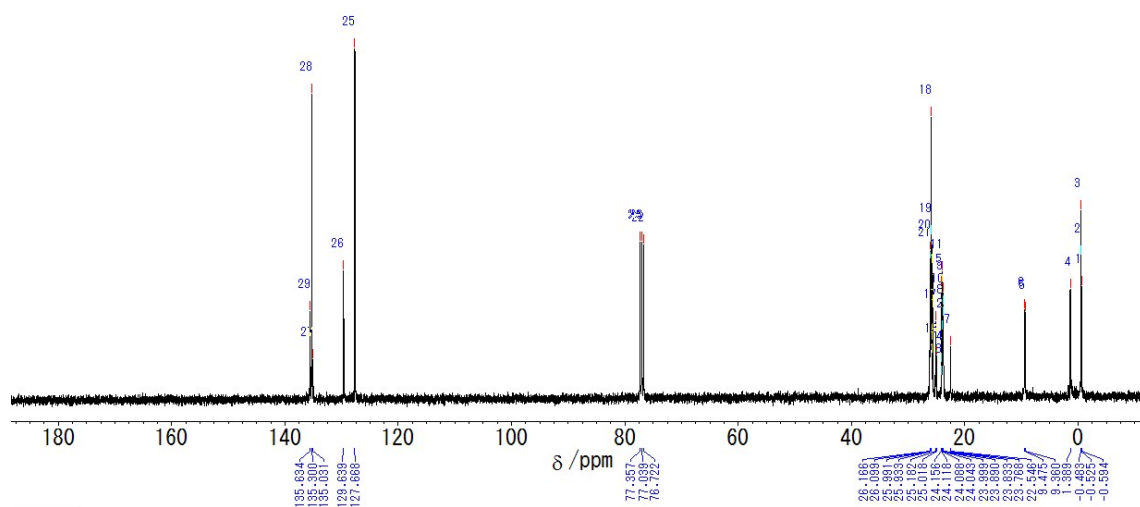

**Figure S20.**  $^{13}\text{C}$  NMR spectrum (100 MHz) of  $6_{t\text{Bu}}$  in  $\text{CDCl}_3$ .

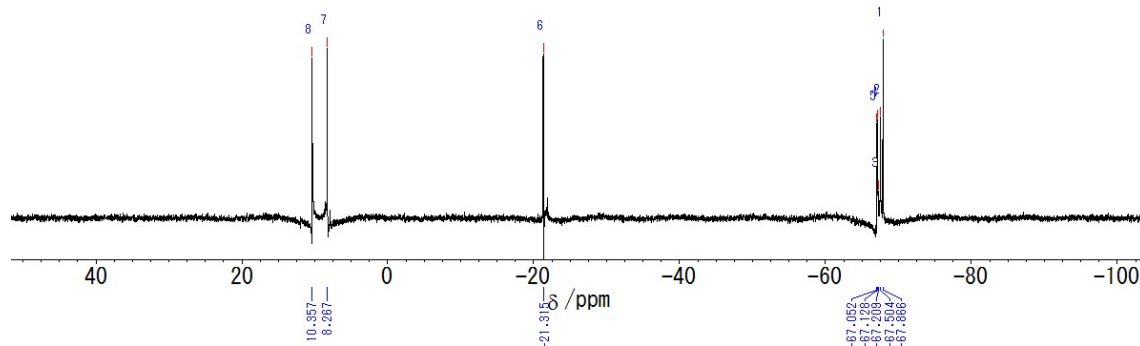

**Figure S21.**  $^{29}\text{Si}$  NMR spectrum (80 MHz) of  $6_{t\text{Bu}}$  in  $\text{CDCl}_3$ .

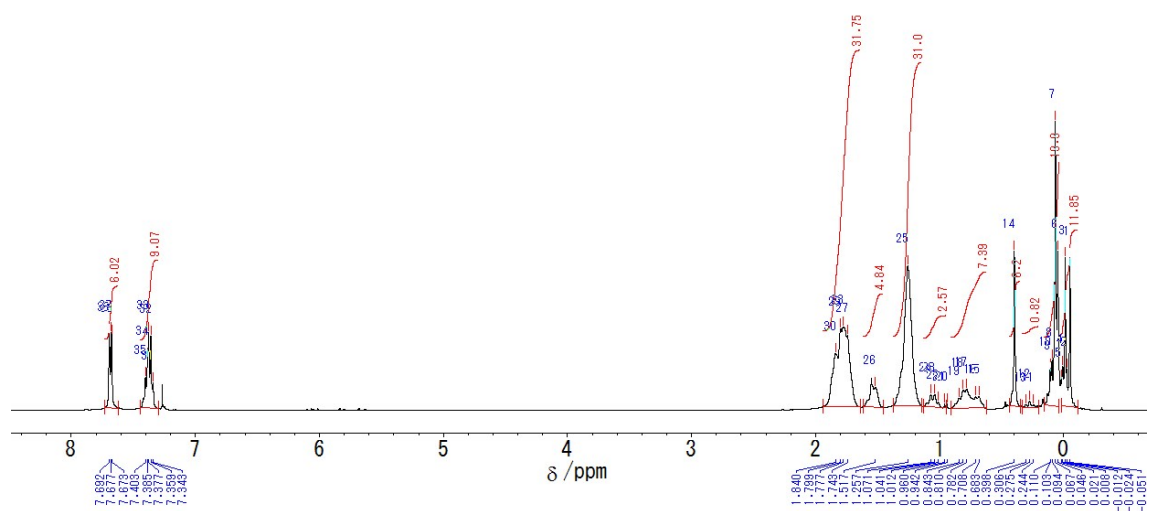

**Figure S22.** <sup>1</sup>H NMR spectrum (400 MHz) of **6<sub>Cyh</sub>** in CDCl<sub>3</sub>.

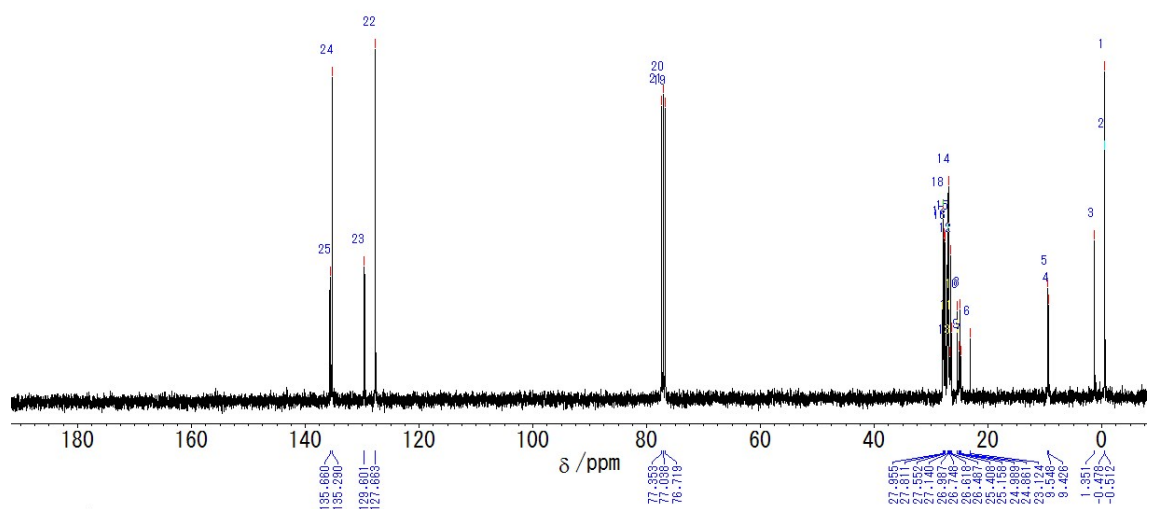

**Figure S23.** <sup>13</sup>C NMR spectrum (100 MHz) of **6<sub>Cyh</sub>** in CDCl<sub>3</sub>.

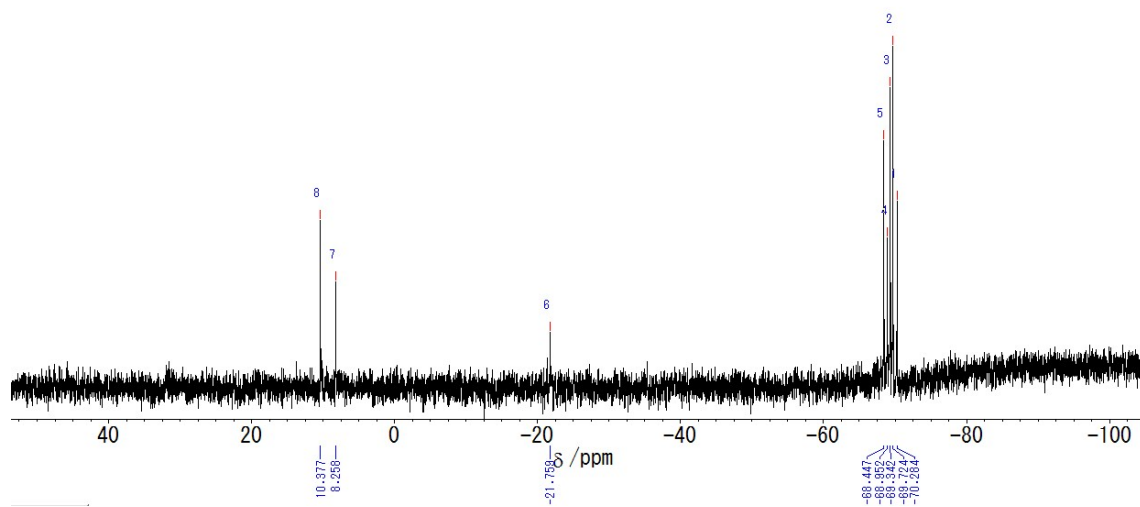

**Figure S24.** <sup>29</sup>Si NMR spectrum (80 MHz) of **6<sub>Cyh</sub>** in CDCl<sub>3</sub>.

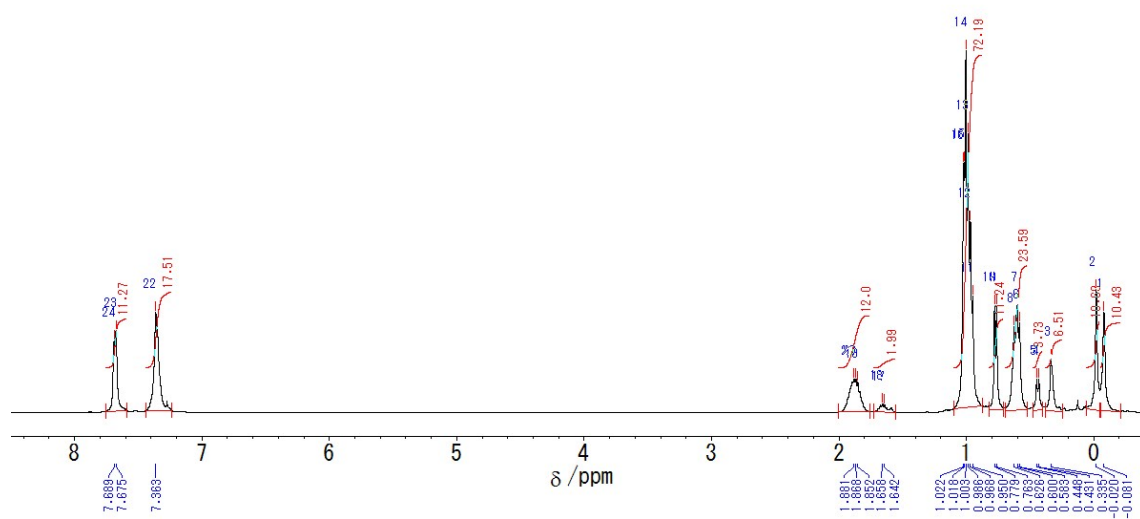

**Figure S25.** <sup>1</sup>H NMR spectrum (400 MHz) of **7<sub>iBu</sub>** in CDCl<sub>3</sub>.



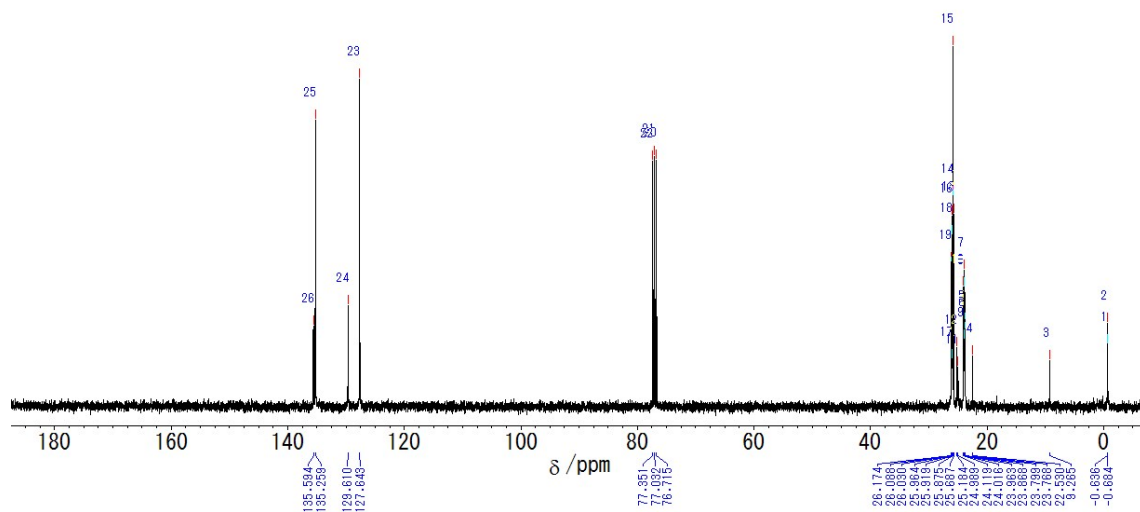

**Figure S26.**  $^{13}\text{C}$  NMR spectrum (100 MHz) of  $7_{i\text{Bu}}$  in  $\text{CDCl}_3$ .

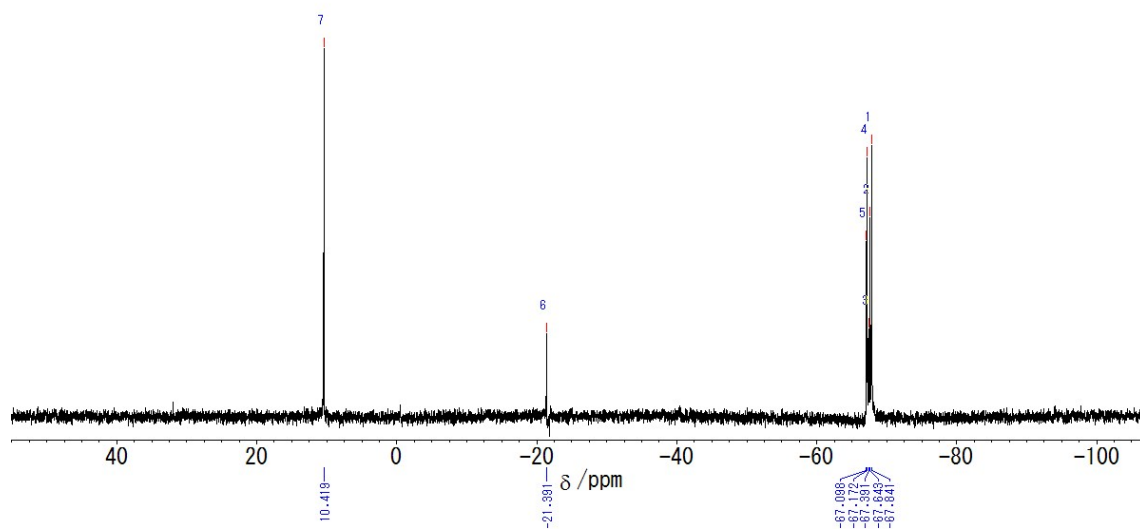

**Figure S27.**  $^{29}\text{Si}$  NMR spectrum (80 MHz) of  $7_{i\text{Bu}}$  in  $\text{CDCl}_3$ .

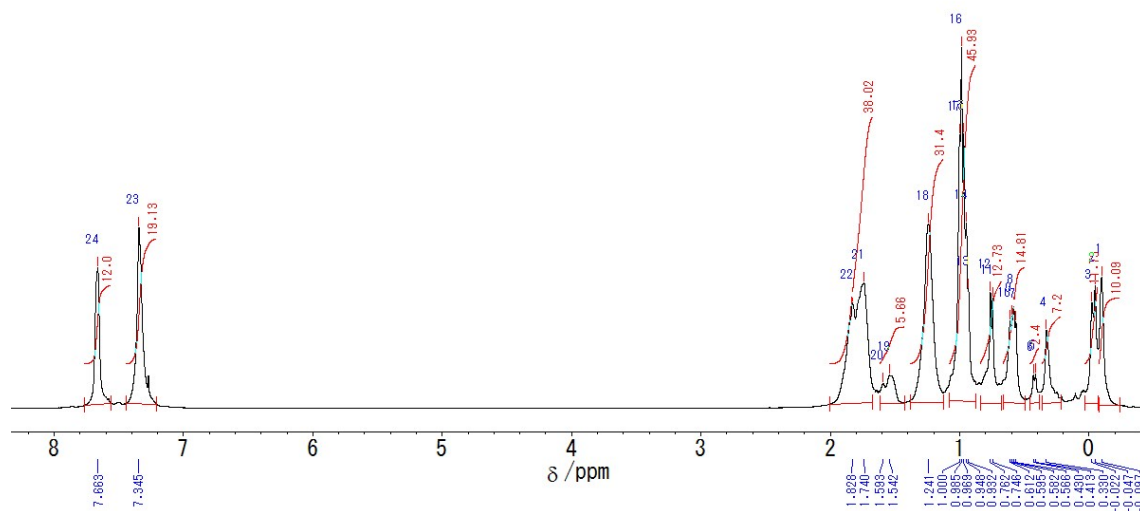

**Figure S28.** <sup>1</sup>H NMR spectrum (400 MHz) of **7<sub>Cyh</sub>** in CDCl<sub>3</sub>.

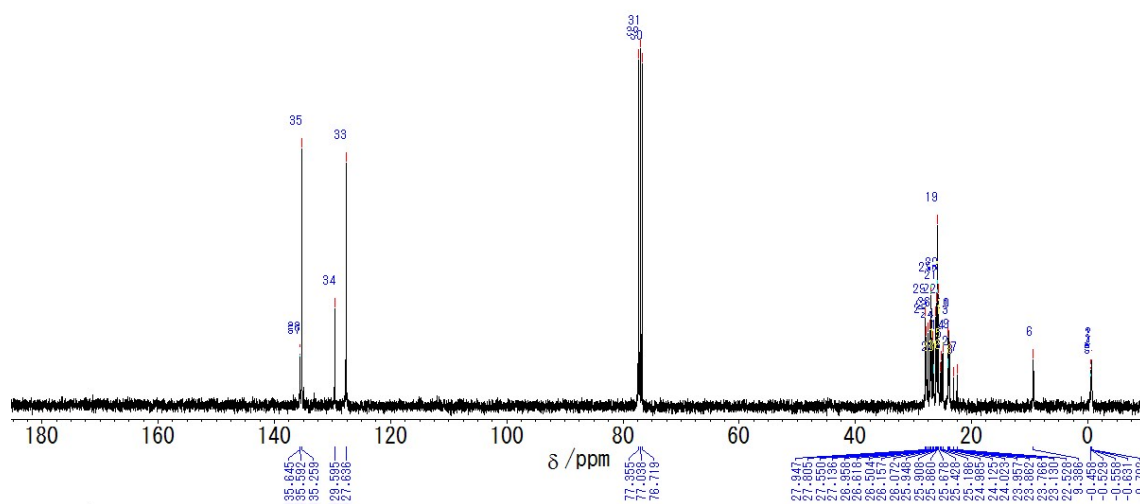

**Figure S29.** <sup>13</sup>C NMR spectrum (100 MHz) of **7<sub>Cyh</sub>** in CDCl<sub>3</sub>.

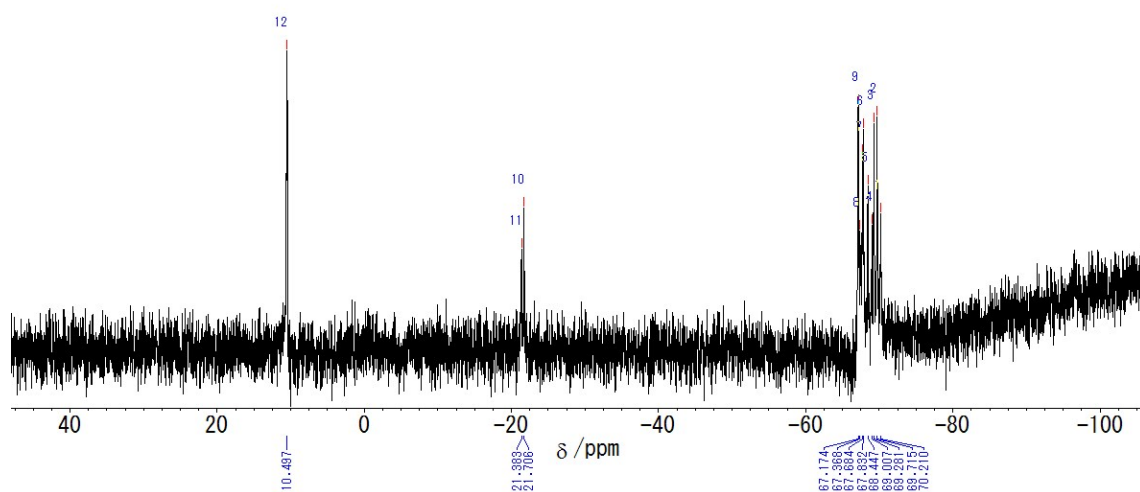

**Figure S30.**  $^{29}\text{Si}$  NMR spectrum (80 MHz) of  $7_{\text{Cyh}}$  in  $\text{CDCl}_3$ .

## 2. SEC analysis

The signals due to the vinyl and hydrosilyl groups almost disappeared in the  $^1\text{H}$ -NMR spectrum of the crude products of  $4_{i\text{Bu}}$ , though the SEC trace showed a sharp peak derived from low molecular weight by-product. This implies that the by-product is a cyclic compound, well corresponding to our previous paper.<sup>[1]</sup>

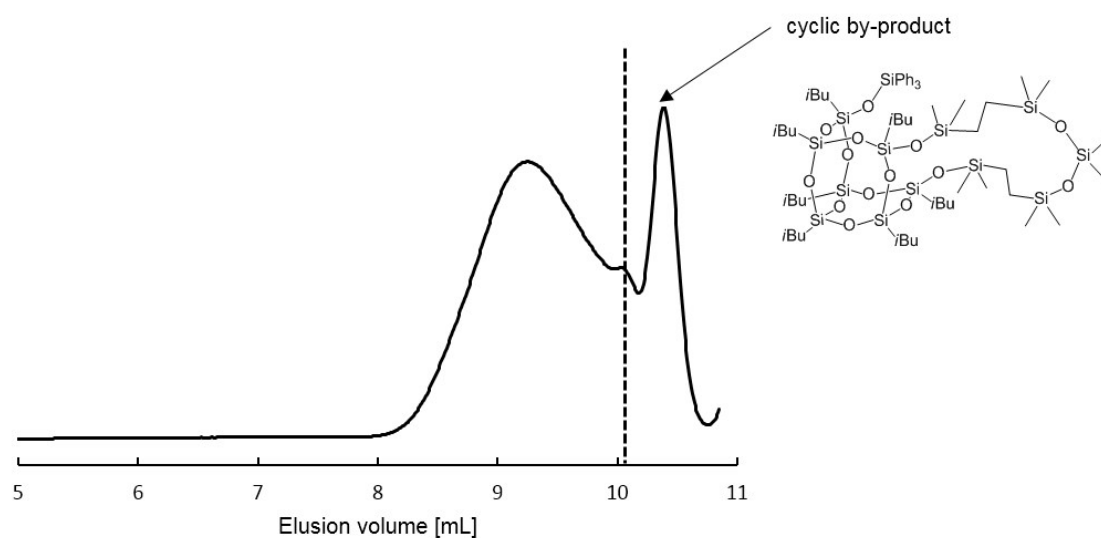

**Figure S31.** SEC trace of  $4_{i\text{Bu}}$  measured in THF (1 mL/min) and detected by RI.

### 3. MALDI-TOF-MASS spectra

(a)

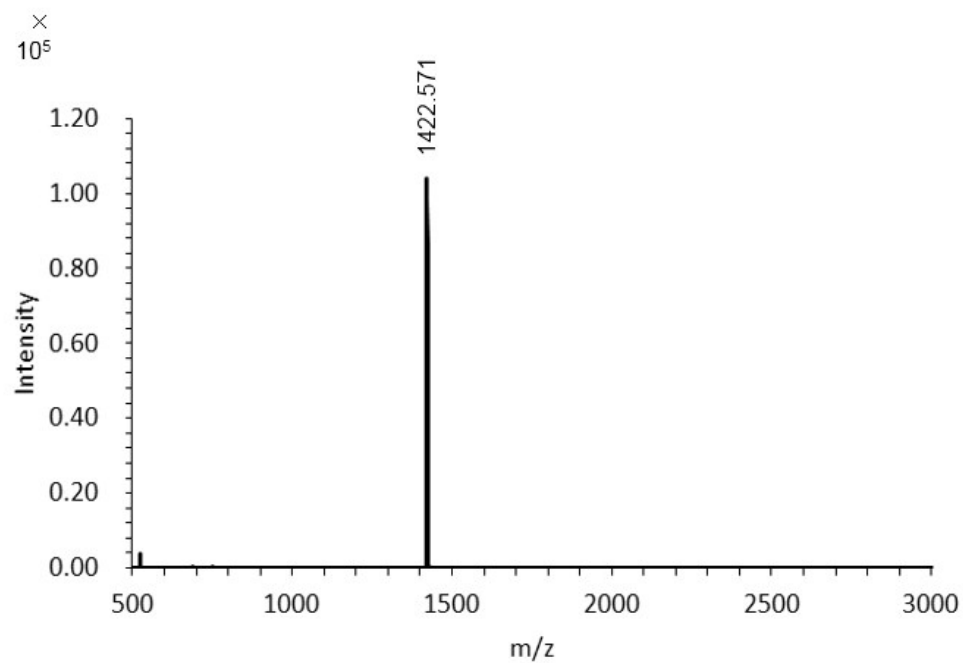

(b)

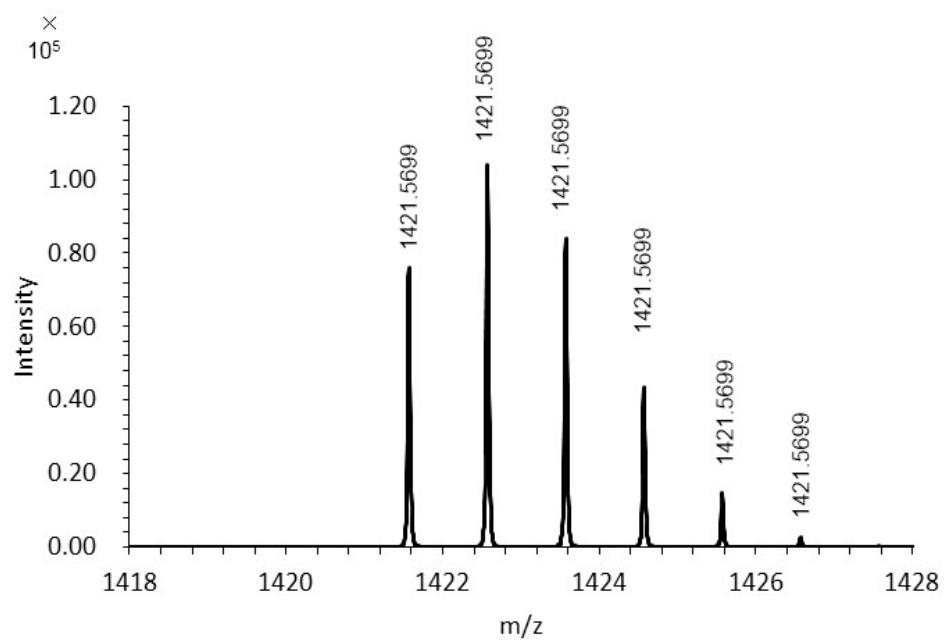

**Figure S32.** MALDI TOF MS spectrum of **3**<sub>CyH</sub>. Matrix: DCTB (20 mg/mL in CHCl<sub>3</sub>), cationizing agents: TFANa (1 mg/mL in THF). (a) Full spectrum and (b) expanded view.

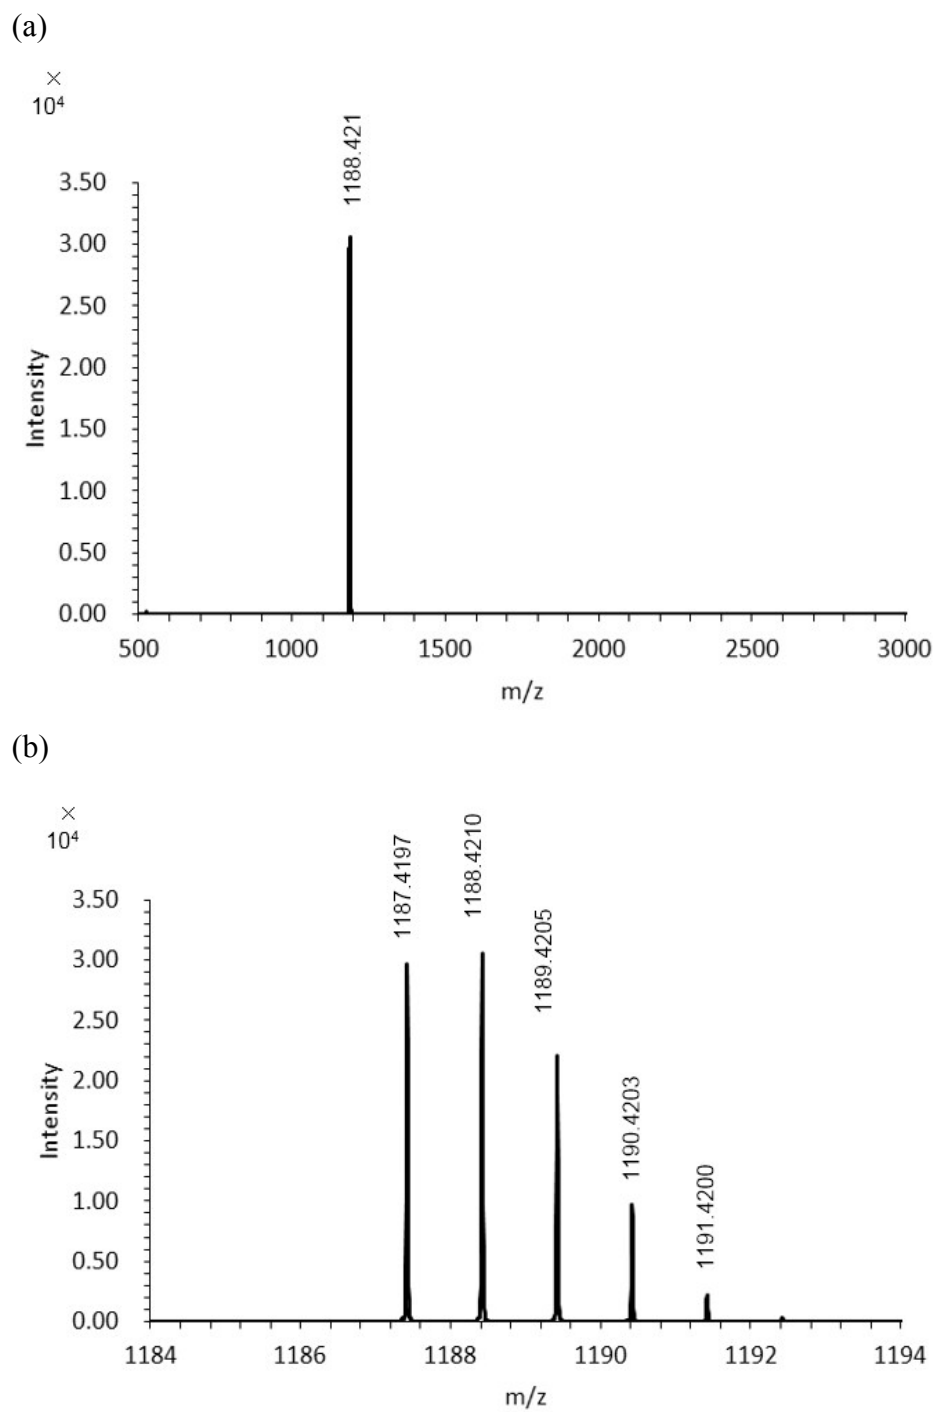

**Figure S33.** MALDI TOF MS spectrum of **4<sub>i</sub>Bu**. Matrix: DCTB (20 mg/mL in CHCl<sub>3</sub>), cationizing agents: TFANa (1 mg/mL in THF). (a) Full spectrum and (b) expanded view.

#### 4. X-ray diffraction patterns

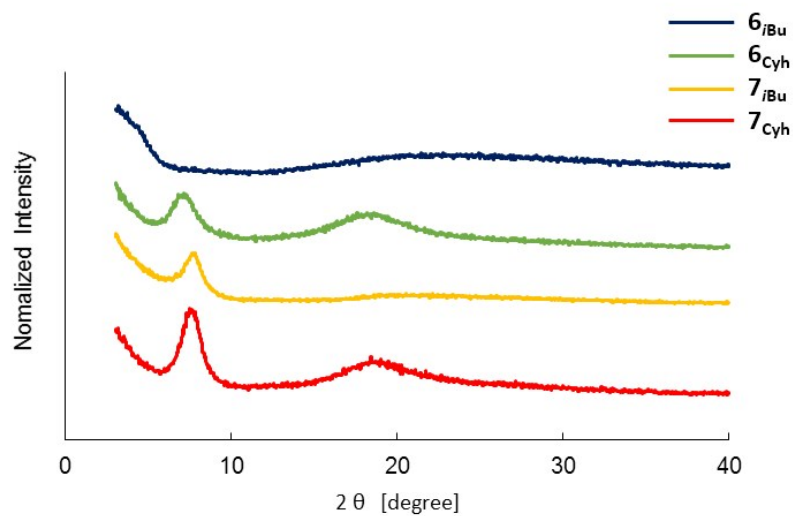

**Figure S34.** Powder X-ray diffraction patterns of **6-7**.

#### 5. Chemical structure of IC-POSS polymer with CC-POSS pendants

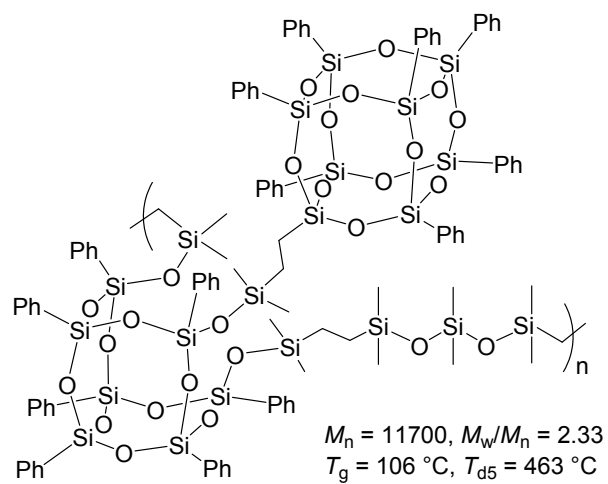

**Figure S35.** Chemical structures and data of previously reported IC-POSS polymer with CC-POSS pendants.<sup>[1]</sup>

[1] H. Imoto, R. Katoh and K. Naka, *Polym. Chem.*, 2018, **9**, 4108.
